# Supplementary material for: Critical Evaluation of Imprinted Gene Expression by RNA–Seq: A New Perspective
Source: PLoS Genet. 2012 Mar 29;8(3):e1002600. doi: 10.1371/journal.pgen.1002600 (PMC3315459; doi:10.1371/journal.pgen.1002600)
Supplement: Table S2 — Putative imprinted loci validated or refuted by pyrosequencing. Table provides detail relevant to each assay: Gene/Transcript, Transcript Model, Reason for Testing, Additional Information, SNP Coordinate (mm9), RNA-Seq allelic counts, Imprinting Scores (POA, PFC, E15 brain, E17.5 brain), Imprinting Calls, Allelic Bias (POA, PFC, E15 Brain, E17.5 Brain), Pyrosequencing Calls, BxC # standard deviations from DNA, CxB # standard deviations from DNA, F1 primer sequence, R1 primer sequence, S1 primer sequence. (XLS) [file pgen.1002600.s008.xls]

## Sheet: Sheet1
Locus Info						RNAseq Allelic Counts																Imprinting Scores (DeVeale et al. scoring methodology - Allelic Counts Aggregated across Transcript)				Impr Call	Allelic Bias				PyroSequencing Data
Order in Figure	Gene/Transcript	Transcript Model	Reason for Testing	Additional Information	SNP Coord (mm9)	POA BxC B6 (maternal)	POA BxC CAST (paternal)	POA CxB B6 (paternal)	POA CxB CAST (maternal)	PFC BxC B6 (maternal)	PFC BxC CAST (paternal)	PFC CxB B6 (paternal)	PFC CxB CAST (maternal)	E15 BxC B6 (maternal)	E15 BxC CAST (paternal)	E15 CxB B6 (paternal)	E15 CxB CAST (maternal)	E17.5 BxC B6 (maternal)	E17.5 BxC CAST (paternal)	E17.5 CxB B6 (maternal)	E17.5 CxB CAST (paternal)	POA Imprinting Score	PFC Imprinting Score	E15 Imprinting Score	E17.5 Imprinting Score	Our imprinting call in E15 and/or E17.5	POA Maternal Bias	PFC Maternal Bias	E15 Maternal Bias	E17.5 Maternal Bias	Pyrosequencing Call (-1=PEG,+1=MEG)	Pyro - BxC # stdevs from DNA	Pyro - CxB # stdevs from DNA	F1 primer	R1 primer	Seq primer
1	Peg3	Peg3_(P)	Positive Control	known - postive control	chr7:6659876	13	352	457	0	94	2035	2626	11	134	4573	4508	27	39	1904	1210	5	-86	<-100	<-100	<-100	-1	0.0158151	0.0220311	0.0174205	0.0139329	-1	-14.7324	21.0518	CGCCAGGGTTTTCCCAGTCACGACATGGCAGGAATCATTATGTATAGG	AGTGACAATTCCAGACCACAGAG	AGAGGTTGCCCCAGT
2	Rasgrf1	Rasgrf1_(P)	Positive Control	known - postive control	chr9:89893541	257	7344	5943	28	424	4553	5558	85	25	317	378	23	40	407	267	9	<-100	<-100	-65	-66	1	0.0209991	0.0479284	0.064603	0.0677732	1	-26.4989	6.76527	CGCCAGGGTTTTCCCAGTCACGACAAGAAGAGTCCGAGGATGACC	TGGTGGGGATTTAACTGGTG	GTCTTCATCACTGTGGTT
3	Frat3	Frat3_(P)	Positive Control	known - postive control, lower IS	chr7:69607265	2	2	6	0	NaN	NaN	NaN	NaN	21	57	83	0	16	20	16	0	0	Not Detected	-4.5	-0.5	-1	0.2	Not Detected	0.130435	0.307692	-1	-18.4349	15.1007	CGCCAGGGTTTTCCCAGTCACGACTATCCAGAGAACTGCAGCTGTTCC	GGGGAGGCTTCTCATAATGGG	GGACACAGTCTCACACAAC
4	Gnas	Gnas_(M)	Positive Control	known - postive control, lower IS	chr2:174110831	721	53	128	619	2	6	11	6	200	179	271	333	364	260	110	175	77.5	-0.7	0.81	4.15	1	0.880999	0.32	0.542218	0.592959	1	17.9696	-18.4736	CGCCAGGGTTTTCCCAGTCACGACCCAGCGAGGGCCCTTAGAT	TGGCCTCCTGGTCTTGCA	GCGGGGCTGCCTGTT
5	DOKist4	uc009hex.1|uc009hey.1	Positive Control	known - postive control, discovered by us (Curr Biol 2008)	chr7:68431711	73	1001	685	3	37	468	587	8	78	1037	641	13	99	530	346	2	<-100	-95	<-100	-71	-1	0.0431328	0.0409091	0.0514415	0.103378	-1	-14.1315	20.6641	CGCCAGGGTTTTCCCAGTCACGACAGGAGGTGACAAGGGGACTATC	CTCTCTTGCCTCCCCTCAT	TTGCCTCCCCTCATT
6	U80893	U80893	DeVeale et al. Novel Candidate	positive in all 4 samples	chr7:68063044	144	1844	1245	31	55	1087	1210	14	113	1873	1094	25	245	1766	1443	13	<-100	<-100	<-100	<-100	-1	0.0536152	0.0291631	0.0444444	0.0744159	-1	-17.0973	17.3106	CGCCAGGGTTTTCCCAGTCACGACACAAGCAAGCAAAAATGAAAGTC	TTCCTCTCAGCATCATAAGAAGAT	CTACAGAAGCTGATCACC
7	Ccdc40	NM_175430	DeVeale et al. Novel Candidate	Positive in 17.5, not in 15	chr11:119113478	73	80	96	40	15	15	29	10	240	196	300	155	158	349	122	66	-0.5	0	0	-4.5	-1	0.391003	0.362319	Not Impr	0.322302	-1	-2.44248	2.71386	GCAGTCGGTAGGCTGTAAATTTG	CGCCAGGGTTTTCCCAGTCACGACGGCTTGCTTTGCTTCTGTTTTG	CCTGGGCTAAATAGAAA
8	Bcl2l1	NM_009743	DeVeale et al. Novel Candidate	positive in 15 not 17.5	chr2:152606796	248	339	307	185	274	352	459	347	232	347	361	199	297	321	268	97	-4	-2.9	-5.9	-0.7	-1	0.401297	0.433659	0.378402	0.400814	-1	-6.20311	2.81079	CGCCAGGGTTTTCCCAGTCACGACAGGGTGGACAGAGGAGAGAGA	TGTGCTCTGCCCCACCTA	TGGCTAGGAGCCCTT
9	Mapt	NM_001038609|NM_010838	DeVeale et al. Novel Candidate	positive in 15 not 17.5	chr11:104190093	5904	5318	4319	4045	3136	2891	4665	4196	8378	7050	10446	12582	13386	9116	7017	4979	0	0	26.2	0	1	Not Impr	Not Impr	0.545038	Not Impr	1	0.930467	-2.69448	CGCCAGGGTTTTCCCAGTCACGACGAGATGGATGGGTGGACTGAGT	GTGTCCCCTCTCCCAACCT	CTCCCAACCTGCCTT
10	Adam23	NM_001177600|NM_011780	DeVeale et al. Novel Candidate	positive in 15 not 17.5, positive in 3 rna-seq samples	chr1:63635298	1275	1590	1233	1000	731	898	1308	896	1136	1794	1228	802	1120	2004	837	739	-6.3	-4.7	-20	-2.1	-1	0.446253	0.424472	0.390726	0.395532	-1	-6.04804	0.600927	AGGTTAAGGAAACGGGGATG	CGCCAGGGTTTTCCCAGTCACGACTAGCGACCCTGTTTTTAATGC	AGGAAACGGGGATGA
11	Wars	NM_011710|NM_001164488|NM_001164314	DeVeale et al. Novel Candidate	positive in 15 not 17.5, positive in 2 rna-seq samples	chr12:110104301	2062	2082	2558	1421	1727	2171	2521	1996	1354	1799	2056	1487	1393	768	896	426	-0.4	-12	-14	0	-1	0.428782	0.442424	0.424283	Not Impr	-1	-2.13232	1.12431	TGGGGTCACTGGCACTCAT	CGCCAGGGTTTTCCCAGTCACGACCCTGCTGCACTCGACCTTCT	GCACTCATCTTGGTCTG
12	Pld4	NM_178911	DeVeale et al. Novel Candidate	Positive in 17.5, not in 15	chr12:114003292	65	74	64	46	59	39	74	47	30	39	16	32	47	135	165	19	-0.6	0	0	-10	-1	0.445783	Not Impr	Not Impr	0.180328	0	-0.504003	-2.57817	ACGACAAGTGCCCATGAAAC	CGCCAGGGTTTTCCCAGTCACGACGACCGCCAGTCCATGTTG	GTTGTGGATGGGCGA
13	Cplx2	NM_009946	DeVeale et al. Novel Candidate	Positive in 17.5, not in 15	chr13:54484173	1719	1526	1463	1318	1066	1232	1430	1865	2896	2561	4524	4095	6436	7046	2906	2589	0	0	0	-4.9	-1	Not Impr	Not Impr	Not Impr	0.475576	0	0.969237	1.06616	CGCCAGGGTTTTCCCAGTCACGACTGGAAGGATGCTGTGTACCA	AATGTGTGCATGTATGTGCTATGT	CCTTTCCAATGCTCAA
14	Rhbdl3	NM_139228	DeVeale et al. Novel Candidate	Positive in 17.5, not in 15	chr11:80168001	81	94	94	81	41	48	71	59	48	35	43	40	27	65	68	27	-0.7	-0.5	0	-4.3	-1	0.462857	0.456621	Not Impr	0.28877	0	-0.0193847	-0.252001	CGCCAGGGTTTTCCCAGTCACGACGCCTCTCTCTTTGGGTGTGG	ACTTCTTCCCTCTGCAGCTTCTG	CTGACTTGCCTGACATT
15	Nsg1	NM_010942	DeVeale et al. Novel Candidate	positive in 15 not 17.5	chr5:38529377	1311	1337	1245	1236	624	536	811	657	1913	2182	2179	1745	795	845	775	724	-0.3	0	-4.8	-0.9	-1	0.496588	Not Impr	0.456167	0.483912	0	-3.48925	-3.50864	CGCCAGGGTTTTCCCAGTCACGACCACCCCATCCTTGTGCTCT	AGGCAATTCTGGGAGGTTCTC	TTTGGTATGTCCCCTG
16	Malat1	NR_002847	DeVeale et al. Novel Candidate	positive in 15 not 17.5	chr19:5796945	2831	2323	2241	2102	2588	2045	3628	2849	8475	6117	4462	5083	4467	7806	2341	3791	0	0	9.96	0	1	Not Impr	Not Impr	0.56171	Not Impr	0	0.930467	-0.73662	CGCCAGGGTTTTCCCAGTCACGACCCAAGGCCAACATTACATCA	GTGAACGAGCCTTTTCTTGTTTAA	GGTAATCTAGTGTTGAATCC
17	Herc3	NM_028705	Predicted Negative in Embryo (Positive in PAO/PFC)	yes, high score which didn't register in embryo	chr6:58869420	1789	784	793	1395	2001	1823	2461	2212	779	898	895	502	329	401	440	201	37.8	0	-2.7	-2.3	0	0.668767	Not Impr	0.416721	0.386579	0	-13.705	-20.8967	CGCCATGCAGAACATTTCCTA	CGCCAGGGTTTTCCCAGTCACGACGCTATGACAAGGCTCAGCTTCTTT	AATGCATGGCTTGTT
18	Apba2	NM_007461	Predicted Negative in Embryo (Positive in PAO/PFC)	yes, high score which didn't register in embryo	chr7:71898464	2395	3150	2836	2343	3174	2982	4385	4082	3197	3194	4215	4196	4939	4469	2540	2465	-11	0	0	0	0	0.441813	Not Impr	Not Impr	Not Impr	0	2.71386	1.10493	TAGTTCTGTGTGGTGTGCTGTCTC	CGCCAGGGTTTTCCCAGTCACGACGGCACCACATTCACATTCCATAG	TGTGGTGTGCTGTCTC
19	Limd1	NM_013860	Predicted Negative (but marginal IS)	We called neg in e17.5, but 10^-4 - 10^-3 with our IS	chr9:123388284	167	119	184	104	82	45	140	69	348	241	273	228	104	162	106	50	0	0	0	-3.6	0	Not Impr	Not Impr	Not Impr	0.364929	0	-3.81879	-0.852928	TGCCTTAGGCTGGACCTGAAA	CGCCAGGGTTTTCCCAGTCACGACGAATGTGGTGGGGGAGATTTG	GGACCTGAAACCTCG
20	Syt16	NM_172804	Predicted Negative (but marginal IS)	We called neg in e17.5, but 10^-4 - 10^-3 with our IS	chr12:75263706	105	85	85	75	229	277	353	393	491	453	478	498	290	386	223	158	0	0	0.56	-3.2	0	Not Impr	Not Impr	0.515104	0.423841	0	-0.116308	1.04678	CGCCAGGGTTTTCCCAGTCACGACAGCCCCACGCTTGGTCAG	GGGCCACGGGGGTATTACA	ACGGGGGTATTACAGA
21	Trak2	NM_172406	Predicted Negative (but marginal IS)	We called neg in e17.5, but 10^-4 - 10^-3 with our IS	chr1:58960543	2113	1726	1776	1588	2100	1514	2522	1987	1484	1116	1739	1075	946	690	410	514	0	0	0	3.45	0	Not Impr	Not Impr	Not Impr	0.570312	0	3.41171	3.1791	CGCCAGGGTTTTCCCAGTCACGACTCTGCTTCTCGGCTTTTTCC	AATAGCCAGGGTGGTCAAGAC	GGGTGGTCAAGACCC
22	Bmp1	NM_009755|NR_033241	Predicted Negative (but marginal IS)	We called neg in e17.5, but 10^-4 - 10^-3 with our IS	chr14:70874715	278	308	248	226	304	265	313	273	606	593	827	539	561	444	190	279	-0.7	0	0	3.9	0	0.475472	Not Impr	Not Impr	0.569878	0	-3.0434	-1.70586	CGCCAGGGTTTTCCCAGTCACGACGCCCCAAGGAGGAATGGT	ATGCCCTCCTGTCAGTGG	GTGGGGCCGGGGAAC
23	5230400G24Rik	NM_029409	Gregg et al. Candidate SNP	GD both crosses p<10^-5 that we called p>10^-3	chr1:82748769	1745	822	1429	639	1759	615	2047	778	2828	1598	1340	792	812	201	614	125	0	0	0	0	0	Not Impr	Not Impr	Not Impr	Not Impr	0	-0.911082	-1.10493	CGCCAGGGTTTTCCCAGTCACGACGCTGTGCAGGACTGAAGTCAAAC	TTTTTAGCCCCGCCTGTG	GGCGATGAAGCAGAGT
24	Hsp90ab1	NM_008302	Gregg et al. Candidate SNP	GD both crosses p<10^-5 that we called p>10^-3	chr17:45706745	3286	3918	2178	2432	120	121	483	506	4941	4636	5538	7030	8872	7755	5168	4698	0	0	3.02	0	0	Not Impr	Not Impr	0.540573	Not Impr	0	3.76064	2.7914	CGCCAGGGTTTTCCCAGTCACGACCGGGGAATGAAGAGCAATG	GGTTCATTTCAGCACTTCTCTGT	GTAGAAGGTCAGTTGGAAT
25	Nme1	NM_008704	Gregg et al. Candidate SNP	GD both crosses p<10^-5 that we called p>10^-3	chr11:93821993	2316	1798	2251	1781	2747	2271	3029	2628	2876	2942	2749	3550	4404	2515	2225	1163	0	0	0	0	0	Not Impr	Not Impr	Not Impr	Not Impr	0	5.15634	4.90434	CGCCAGGGTTTTCCCAGTCACGACTTGGAGAGGGGTGGAAAGC	TCTAAGCCTGGGACCATACGAG	ACGAGGAGACTTCTGC
26	Nsg2	NM_008741	Gregg et al. Candidate SNP	GD both crosses p<10^-5 that we called p>10^-3	chr11:31958492	1859	1583	1942	1648	481	420	330	243	1199	1184	818	702	9189	6309	4212	2796	0	0	0	0	0	Not Impr	Not Impr	Not Impr	Not Impr	0	-1.24062	-0.891698	AAGGGAGAGAAAGGAAGAGAGGT	CGCCAGGGTTTTCCCAGTCACGACCTGCTGTCATTAGCGCTTTG	ACCCAGCTAAAAGCATA
27	AK138412	AK138412	Gregg et al. Candidate SNP	GD both crosses 10^-5<p<10^-3 that we called p>10^-3	chr4:42955837	627	655	590	604	NaN	NaN	NaN	NaN	1006	840	917	1237	383	410	201	224	0	Not Detected	4.21	0	0	Not Impr	Not Detected	0.56075	Not Impr	0	-0.0581542	-0.0581542	CGCCAGGGTTTTCCCAGTCACGACAACTGTCTAGTAGGGGCCCATC	GTTGGAAGGAGACGTGGACT	GCCAGTTCAAGTTTTGTG
28	Cald1	NM_145575	Gregg et al. Candidate SNP	GD both crosses 10^-5<p<10^-3 that we called p>10^-3	chr6:34724967	252	233	202	188	135	185	210	234	999	787	724	597	569	361	305	190	0	0	0	0	0	Not Impr	Not Impr	Not Impr	Not Impr	0	1.91909	1.76401	GCCAAAGGAAGAAAAGCCACTAA	CGCCAGGGTTTTCCCAGTCACGACCCATGTGCACTCTGTTCGTCTTAC	GCACAAGTCATCTACCC
29	Ddit4	NM_029083	Gregg et al. Candidate SNP	GD both crosses 10^-5<p<10^-3 that we called p>10^-3	chr10:59412791	377	344	336	287	168	131	213	158	281	206	337	364	725	548	352	278	0	0	0.78	0	0	Not Impr	Not Impr	0.542929	Not Impr	0	6.14496	3.37294	CGCCAGGGTTTTCCCAGTCACGACCTGCCTCGAACAGGTCAGTA	CTGGTCTGAAAGGACCTAGTGTG	TTTGTCATTTGTTTTGTATC
30	Dvl3	NM_007889	Gregg et al. Candidate SNP	GD both crosses 10^-5<p<10^-3 that we called p>10^-3	chr16:20532543	211	230	171	178	107	157	182	231	222	228	354	345	922	965	796	687	0	0	-0.3	-0.7	0	Not Impr	Not Impr	0.493473	0.477448	0	2.77202	0.193847	ACCCTCACACCCACACTACAAG	CGCCAGGGTTTTCCCAGTCACGACGGAGGGAAGCAAACTTCTCTACT	CCCAGGTGTAAGACTGT
31	Ina	NM_146100	Gregg et al. Candidate SNP	GD both crosses 10^-5<p<10^-3 that we called p>10^-3	chr19:47098091	2502	2778	1026	1169	2501	2739	2467	2812	8211	7441	6889	6652	9822	6690	4593	2918	0	0	0	0	0	Not Impr	Not Impr	Not Impr	Not Impr	0	0.484618	1.88032	GGGAAGCGGTAATATCTACGAAG	CGCCAGGGTTTTCCCAGTCACGACAGCGGCATTACATTTTTTGG	GTAATATCTACGAAGAAAAC
32	1700027N10Rik	NM_029338	Gregg et al. Candidate SNP	GD both crosses 10^-3<p<10^-2 that we called p>10^-3	chr17:46266257	203	300	181	224	101	144	128	178	190	220	169	202	186	310	101	136	0	0	0	0	0	Not Impr	Not Impr	Not Impr	Not Impr	0	1.06616	-0.174463	CGCCAGGGTTTTCCCAGTCACGACCAGAACAAAAAGGCCCAACAGT	GTAGGAAGGCAGGCTGGATATT	TGGATATTTATGTGGGGT
33	Pitpnm2	NM_011256	Gregg et al. Candidate SNP	GD both crosses 10^-3<p<10^-2 that we called p>10^-3	chr5:124571589	1516	808	1478	771	2790	1408	3942	2071	906	508	1626	822	1440	1185	706	577	0	0	0	0	0	Not Impr	Not Impr	Not Impr	Not Impr	0	0.73662	-0.891698	CGCCAGGGTTTTCCCAGTCACGACCTTGAGCTGGGCCAGGTG	CCTGCCCCTGTCACTCCT	ACTCCTTTGCAGTTCAT
34	AK011885	AK011885	Gregg et al. Candidate SNP	GD both crosses 10^-2<p<10^-1.3 that we called p>10^-3	chr6:136556999	44	27	34	16	41	26	37	32	166	150	52	55	22	18	9	6	0	0	0.37	0	0	Not Impr	Not Impr	0.522459	Not Impr	0	-0.193847	-0.0775389	TGTGCATTTGCCTCTATGATGG	CGCCAGGGTTTTCCCAGTCACGACCAAAGTTCACGCCGAAGATGAC	TGGCTTACAGAAGGAATC
35	Asb6	NM_133346	Gregg et al. Candidate SNP	GD both crosses 10^-2<p<10^-1.3 that we called p>10^-3	chr2:30678811	328	274	258	247	357	303	401	305	278	218	385	446	341	180	164	133	0	0	1.72	0	0	Not Impr	Not Impr	0.545592	Not Impr	0	1.66709	1.26001	CGCCAGGGTTTTCCCAGTCACGACCCTGCTGTGCTCGTGATG	TCAGGGCTCTGGCACTGT	TGGTAGCTCTGCTCA
36	Chmp1a	NM_145606	Gregg et al. Candidate SNP	GD both crosses 10^-2<p<10^-1.3 that we called p>10^-3	chr8:125729420	1905	812	1859	801	1439	615	1747	902	1729	674	1413	469	718	608	524	326	0	0	0	0	0	Not Impr	Not Impr	Not Impr	Not Impr	0	-18.9195	-20.509	CGCCAGGGTTTTCCCAGTCACGACACTCCACATAGGCAGAGGACAACA	TTTGCACAAGTGTGTGGTGACATA	TGTGGTGACATATGTGC
37	Enpp5	NM_032003|NM_001168620	Gregg et al. Candidate SNP	GD both crosses 10^-2<p<10^-1.3 that we called p>10^-3	chr17:44221379	4273	3025	4232	2809	3673	2160	4176	2808	3560	2500	2971	1661	1657	1214	837	629	0	0	0	0	0	Not Impr	Not Impr	Not Impr	Not Impr	0	5.66034	1.53139	GTCACGAGTCATGCTCCTCATTA	CGCCAGGGTTTTCCCAGTCACGACGGTTATGGCAAAGATGGAGACCT	CGAGTCATGCTCCTCATTA
